# Supplementary material
Source: MDPI journal article supplement (https://www.mdpi.com/2073-4395/13/11/2837)
Supplement: s1 [file s1]

Archive with 5 entries (5 files):
- Supplementary material_Figure S1_MDdocx.pdf
- Supplementary material_Table S1_MD.pdf
- Supplementary material_Table S2_MD.pdf
- Supplementary material_Table S3_MD.pdf
- Supplementary material_Table S4_MD.pdf
