# Supplementary material
Source: MDPI journal article supplement (https://www.mdpi.com/2073-4395/13/11/2837)
Supplement: s1 [file s1 › Supplementary material_Figure S1_MDdocx.pdf]

## Supplementary material

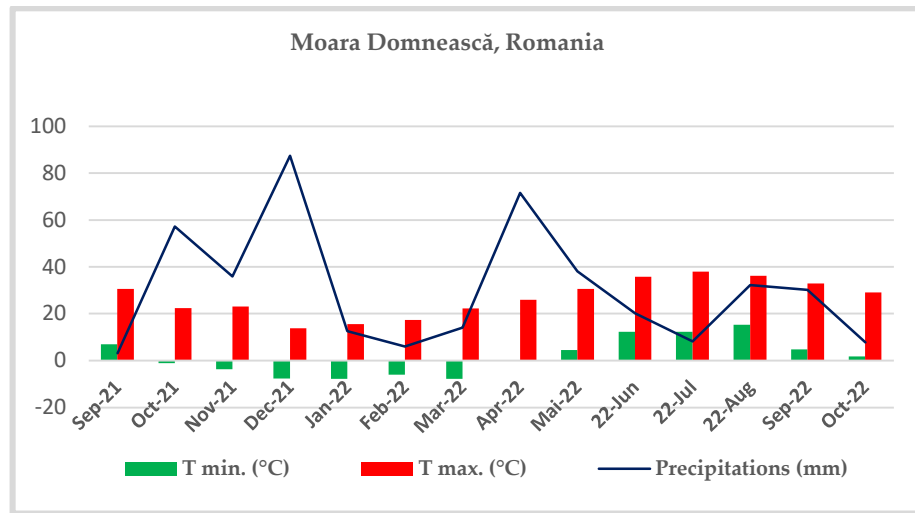

**Figure S1.** Rainfall (mm) and maximum and minimum air temperatures (°C) in the Moara Domnească area during September 2021-October 2022 period
