# Supplementary material
Source: MDPI journal article supplement (https://www.mdpi.com/2073-4395/13/11/2837)
Supplement: s1 [file s1 › Supplementary material_Table S1_MD.pdf]

## Supplementary material

**Table S1.** Air temperatures and rainfall values for the Moara Domnească area during September 2021-October 2022 vegetation period

| Month                        | Minimum air temperatures (°C) | Maximum air temperatures (°C) | Rainfall (mm) |
|------------------------------|-------------------------------|-------------------------------|---------------|
| 2021 – 2022 growing season   |                               |                               |               |
| September                    | 6.9                           | 30.5                          | 3.1           |
| October                      | -1.2                          | 22.3                          | 57.2          |
| November                     | -3.8                          | 23.1                          | 35.9          |
| December                     | -7.7                          | 13.8                          | 87.5          |
| January                      | -7.9                          | 15.5                          | 12.5          |
| February                     | -6.0                          | 17.3                          | 5.9           |
| March                        | -7.9                          | 22.2                          | 14.0          |
| April                        | 0.1                           | 25.9                          | 71.5          |
| May                          | 4.5                           | 30.6                          | 38.1          |
| June                         | 12.3                          | 35.7                          | 20.2          |
| July                         | 12.2                          | 38.0                          | 8.1           |
| August                       | 15.3                          | 36.2                          | 32.2          |
| September                    | 4.7                           | 32.9                          | 30.2          |
| October                      | 1.7                           | 29.1                          | 7.7           |
| Average (Sept.2021-Oct.2022) | 1.7                           | 26.65                         | 30.29         |
