# Supplementary material
Source: MDPI journal article supplement (https://www.mdpi.com/2073-4395/13/11/2837)
Supplement: s1 [file s1 › Supplementary material_Table S2_MD.pdf]

## Supplementary material

**Table S2.** Red preluvosoil physicochemical properties at different soil layer depths

| <b>Horizons and soil depth<br/>(cm)</b> | <b>Ap<br/>(0-22 cm)</b> | <b>Ao<br/>(22-55 cm)</b> | <b>A/B<br/>(55-86 cm)</b> | <b>Bt<sub>1</sub><br/>(86-149 cm)</b> | <b>Bt<sub>2</sub><br/>(149-220 cm)</b> |
|-----------------------------------------|-------------------------|--------------------------|---------------------------|---------------------------------------|----------------------------------------|
| <b>Soil properties</b>                  |                         |                          |                           |                                       |                                        |
| BD (g/cm <sup>3</sup> )                 | 1.43                    | 1.59                     | 1.68                      | 1.75                                  | 1.67                                   |
| TP (%)                                  | 42.74                   | 36.45                    | 32.44                     | 29.89                                 | 32.83                                  |
| GD (%)                                  | 10.96                   | 25.86                    | 35.38                     | 40.85                                 | 35.02                                  |
| Moisture (%)                            | 20.75                   | 20.97                    | 19.99                     | 17.60                                 | 16.43                                  |
| pH                                      | 5.56                    | 5.59                     | 6.40                      | 6.89                                  | 7.25                                   |
| C <sub>org</sub> (%)                    | 2.31                    | 1.87                     | 1.42                      | 0.50                                  | 0.42                                   |
| Humus (%)                               | 3.98                    | 3.22                     | 2.44                      | 0.86                                  | 0.72                                   |
| Nt (%)                                  | 0.223                   | 0.021                    | 0.193                     | 0.114                                 | 0.023                                  |
| Available P (mg/kg)                     | 158                     | 158                      | 261                       | 157                                   | 148                                    |
| Available K (mg/kg)                     | 392                     | 212                      | 204                       | 254                                   | 252                                    |

N

Abbreviations: bulk density (BD); total porosity (TP); compaction degree (GD); organic carbon (C<sub>org</sub>); total nitrogen (Nt)
