# Supplementary material
Source: MDPI journal article supplement (https://www.mdpi.com/2073-4395/13/11/2837)
Supplement: s1 [file s1 › Supplementary material_Table S3_MD.pdf]

## Supplementary material

**Table S3.** Soil chemical properties under mineral and organic fertilizers and different crops (June 2022)

| Treatments                               | pH                                                                        | C <sub>org</sub> (%)                                                         | Humus (%)                                                                   | Nt (%)                                                                       |
|------------------------------------------|---------------------------------------------------------------------------|------------------------------------------------------------------------------|-----------------------------------------------------------------------------|------------------------------------------------------------------------------|
| Mixture of perennial grasses and legumes |                                                                           |                                                                              |                                                                             |                                                                              |
| V1 - Control                             | 5.95 ± 0.10 a<br>(cv)                                                     | 2.01 ± 0.07 d<br>(cv)                                                        | 3.45 ± 0.04 c<br>(cv)                                                       | 0.154 ± 0.002 c<br>(cv)                                                      |
| V2 - NPK                                 | 5.56 ± 0.15 d<br>(ooo)                                                    | 2.02 ± 0.08 d<br>(ns)                                                        | 3.48 ± 0.13 c<br>(ns)                                                       | 0.161 ± 0.003 b<br>(*)                                                       |
| V3 – 15 t/ha<br>MC                       | 6.07 ± 0.12 a<br>(ns)                                                     | 2.17 ± 0.05 c (*)                                                            | 3.74 ± 0.06 b (*)                                                           | 0.171 ± 0.002 a<br>(***)                                                     |
| V4 – 15 t/ha<br>MC + NPK                 | 5.66 ± 0.21 c<br>(oo)                                                     | 2.21 ± 0.04 b (**)                                                           | 3.81 ± 0.05 b (*)                                                           | 0.174 ± 0.004 a<br>(***)                                                     |
| V5 – 30 t/ha<br>MC                       | 6.07 ± 0.05 a<br>(ns)                                                     | 2.22 ± 0.05 b (**)                                                           | 3.82 ± 0.12 b (*)                                                           | 0.175 ± 0.003 a<br>(***)                                                     |
| V6 – 30 t/ha<br>MC + NPK                 | 5.83 ± 0.22 b<br>(ns)                                                     | 2.22 ± 0.03 b (**)                                                           | 3.82 ± 0.15 b (*)                                                           | 0.175 ± 0.003 a<br>(***)                                                     |
| V7 – 60 t/ha<br>MC                       | 5.87 ± 0.09 b<br>(ns)                                                     | 2.30 ± 0.09 a<br>(***)                                                       | 3.96 ± 0.17 a (**)                                                          | 0.180 ± 0.004 a<br>(***)                                                     |
| V8 – 60 t/ha<br>MC + NPK                 | 6.00 ± 0.02 a<br>(ns)                                                     | 2.26 ± 0.04 b (**)                                                           | 3.89 ± 0.15 a (**)                                                          | 0.177 ± 0.003 a<br>(***)                                                     |
| <i>LSD</i>                               | <i>LSD 5% - 0.248</i><br><i>LSD 1% - 0.376</i><br><i>LSD 0.1% - 0.604</i> | <i>LSD 5% - 0.116%</i><br><i>LSD 1% - 0.176%</i><br><i>LSD 0.1% - 0.283%</i> | <i>LSD 5% - 0.250%</i><br><i>LSD 1% -0.378%</i><br><i>LSD 0.1% - 0.608%</i> | <i>LSD 5% - 0.006%</i><br><i>LSD 1% - 0.009%</i><br><i>LSD 0.1% - 0.015%</i> |
| Treatments                               | pH                                                                        | C <sub>org</sub> (%)                                                         | Humus (%)                                                                   | Nt (%)                                                                       |
| Winter wheat crop                        |                                                                           |                                                                              |                                                                             |                                                                              |
| V1 - Control                             | 6.01 ± 0.03 b<br>(cv)                                                     | 2.03 ± 0.09 c (cv)                                                           | 3.49 ± 0.27 c<br>(cv)                                                       | 0.157 ± 0.002 c<br>(cv)                                                      |
| V2 - NPK                                 | 5.71 ± 0.06 c<br>(oo)                                                     | 2.21 ± 0.11 b<br>(ns)                                                        | 3.81 ± 0.07 b (*)                                                           | 0.174 ± 0.003 b<br>(**)                                                      |
| V3 – 15 t/ha<br>MC                       | 6.25 ± 0.05 a<br>(**)                                                     | 2.30 ± 0.06 a (*)                                                            | 3.96 ± 0.13 a (**)                                                          | 0.180 ± 0.005 a<br>(***)                                                     |
| V4 – 15 t/ha<br>MC + NPK                 | 5.60 ± 0.15 d<br>(ooo)                                                    | 1.99 ± 0.19 c (ns)                                                           | 3.43 ± 0.09 c<br>(ns)                                                       | 0.159 ± 0.006 c<br>(ns)                                                      |
| V5 – 30 t/ha<br>MC                       | 6.27 ± 0.02 a<br>(**)                                                     | 2.25 ± 0.16 b<br>(ns)                                                        | 3.87 ± 0.14 b (*)                                                           | 0.177 ± 0.004 b<br>(**)                                                      |
| V6 – 30 t/ha<br>MC + NPK                 | 6.06 ± 0.07 b<br>(ns)                                                     | 2.36 ± 0.13 a (*)                                                            | 4.06 ± 0.11 a (**)                                                          | 0.184 ± 0.004 a<br>(**)                                                      |
| V7 – 60 t/ha<br>MC                       | 6.25 ± 0.03 a<br>(**)                                                     | 2.30 ± 0.13 ab<br>(ns)                                                       | 3.96 ± 0.15 a (**)                                                          | 0.180 ± 0.006 a<br>(***)                                                     |
| V8 – 60 t/ha<br>MC + NPK                 | 5.92 ± 0.10 b<br>(ns)                                                     | 2.23 ± 0.13 b<br>(ns)                                                        | 3.84 ± 0.16 b (*)                                                           | 0.175 ± 0.004 b<br>(**)                                                      |
| <i>LSD</i>                               | <i>LSD 5% - 0.145</i><br><i>LSD 1% - 0.219</i><br><i>LSD 0.1% - 0.352</i> | <i>LSD 5% - 0.263%</i><br><i>LSD 1% - 0.399%</i><br><i>LSD 0.1% - 0.641%</i> | <i>LSD 5% - 0.257%</i><br><i>LSD 1% -0.389%</i><br><i>LSD 0.1% - 0.624%</i> | <i>LSD 5% - 0.010%</i><br><i>LSD 1% - 0.014%</i><br><i>LSD 0.1% - 0.023%</i> |

| Treatments               | pH                                                   | C <sub>org</sub> (%)                                    | Humus (%)                                               | Nt (%)                                                  |
|--------------------------|------------------------------------------------------|---------------------------------------------------------|---------------------------------------------------------|---------------------------------------------------------|
| Maize crop               |                                                      |                                                         |                                                         |                                                         |
| V1 - Control             | 5.85 ± 0.14 a<br>(cv)                                | 2.08 ± 0.06 c (cv)                                      | 3.58 ± 0.10 d<br>(cv)                                   | 0.168 ± 0.006 c<br>(cv)                                 |
| V2 - NPK                 | 5.54 ± 0.06 b<br>(o)                                 | 2.25 ± 0.05 c (ns)                                      | 3.87 ± 0.08 c<br>(ns)                                   | 0.177 ± 0.005 c<br>(ns)                                 |
| V3 – 15 t/ha<br>MC       | 5.90 ± 0.20 a<br>(ns)                                | 2.23 ± 0.08 c (ns)                                      | 3.84 ± 0.14 c<br>(ns)                                   | 0.175 ± 0.004 c<br>(ns)                                 |
| V4 – 15 t/ha<br>MC + NPK | 5.46 ± 0.14 b<br>(o)                                 | 2.22 ± 0.10 c (ns)                                      | 3.82 ± 0.18 c<br>(ns)                                   | 0.175 ± 0.007 c<br>(ns)                                 |
| V5 – 30 t/ha<br>MC       | 5.78 ± 0.10 a<br>(ns)                                | 2.44 ± 0.09 a (**)                                      | 4.20 ± 0.16 a (**)                                      | 0.189 ± 0.004 a<br>(**)                                 |
| V6 – 30 t/ha<br>MC + NPK | 5.84 ± 0.15 a<br>(ns)                                | 2.30 ± 0.12 b (*)                                       | 3.96 ± 0.20 b (*)                                       | 0.180 ± 0.003 b<br>(*)                                  |
| V7 – 60 t/ha<br>MC       | 5.88 ± 0.16 a<br>(ns)                                | 2.28 ± 0.10 b (*)                                       | 3.93 ± 0.18 b (*)                                       | 0.179 ± 0.005 b<br>(*)                                  |
| V8 – 60 t/ha<br>MC + NPK | 5.69 ± 0.20 b<br>(ns)                                | 2.25 ± 0.13 c (ns)                                      | 3.87 ± 0.21 c<br>(ns)                                   | 0.177 ± 0.003 c<br>(ns)                                 |
| LSD                      | LSD 5% - 0.284<br>LSD 1% - 0.430<br>LSD 0.1% - 0.691 | LSD 5% - 0.202%<br>LSD 1% - 0.305%<br>LSD 0.1% - 0.490% | LSD 5% - 0.346%<br>LSD 1% - 0.524%<br>LSD 0.1% - 0.842% | LSD 5% - 0.010%<br>LSD 1% - 0.015%<br>LSD 0.1% - 0.024% |
| Treatments               | pH                                                   | C <sub>org</sub> (%)                                    | Humus (%)                                               | Nt (%)                                                  |
| Soybean crop             |                                                      |                                                         |                                                         |                                                         |
| V1 - Control             | 6.03 ± 0.05 b<br>(cv)                                | 1.97 ± 0.05 d<br>(cv)                                   | 3.39 ± 0.20 d<br>(cv)                                   | 0.156 ± 0.005 d<br>(cv)                                 |
| V2 - NPK                 | 6.05 ± 0.06 b<br>(ns)                                | 2.04 ± 0.07 d<br>(ns)                                   | 3.50 ± 0.13 d<br>(ns)                                   | 0.162 ± 0.004 d<br>(ns)                                 |
| V3 – 15 t/ha<br>MC       | 6.21 ± 0.07 a<br>(ns)                                | 2.31 ± 0.05 a<br>(***)                                  | 3.98 ± 0.09 b<br>(**)                                   | 0.181 ± 0.006 b<br>(**)                                 |
| V4 – 15 t/ha<br>MC + NPK | 5.92 ± 0.20 b<br>(ns)                                | 2.41 ± 0.05 a<br>(***)                                  | 4.15 ± 0.10 a<br>(***)                                  | 0.187 ± 0.003 a<br>(***)                                |
| V5 – 30 t/ha<br>MC       | 5.85 ± 0.09 c<br>(ns)                                | 2.07 ± 0.12 d<br>(ns)                                   | 3.56 ± 0.09 d<br>(ns)                                   | 0.167 ± 0.005 c<br>(*)                                  |
| V6 – 30 t/ha<br>MC + NPK | 5.92 ± 0.18 b<br>(ns)                                | 2.13 ± 0.08 c (*)                                       | 3.67 ± 0.13 c (*)                                       | 0.169 ± 0.007 c<br>(*)                                  |
| V7 – 60 t/ha<br>MC       | 5.82 ± 0.18 c<br>(ns)                                | 2.20 ± 0.08 b (**)                                      | 3.79 ± 0.15 b<br>(**)                                   | 0.173 ± 0.005 b<br>(**)                                 |
| V8 – 60 t/ha<br>MC + NPK | 5.87 ± 0.10 b<br>(ns)                                | 2.12 ± 0.04 c (*)                                       | 3.65 ± 0.07 c (*)                                       | 0.168 ± 0.003 c<br>(*)                                  |
| LSD                      | LSD 5% - 0.252<br>LSD 1% - 0.382<br>LSD 0.1% - 0.613 | LSD 5% - 0.137%<br>LSD 1% - 0.208%<br>LSD 0.1% - 0.334% | LSD 5% - 0.250%<br>LSD 1% - 0.378%<br>LSD 0.1% - 0.607% | LSD 5% - 0.011%<br>LSD 1% - 0.016%<br>LSD 0.1% - 0.026% |

Significant differences between treatments are indicated by different lowercase letters (Duncan's test;  $p < 0.05$ ; mean  $\pm$  SD,  $n = 4$ ). Means followed by the same letter are not significantly different (ns); \*\*\*, \*\*, and \* indicate significant differences at LSD 5%, LSD 1%, and LSD 0.1% respectively; ns—non-significant; ooo, oo, and o, indicate negative significant differences compared to the control; cv – control variant.

Abbreviations: manure compost (MC); chemical fertilisers only (NPK); least significant differences (LSD); organic carbon (C<sub>org</sub>); total nitrogen (Nt)
