# Supplementary material
Source: MDPI journal article supplement (https://www.mdpi.com/2073-4395/13/11/2837)
Supplement: s1 [file s1 › Supplementary material_Table S4_MD.pdf]

## Supplementary material

**Table S4.** Soil chemical properties under mineral and organic fertilizers and after crop harvesting (October 2022)

| Treatments                                  | pH                                                   | C <sub>org</sub> (%)                                    | Humus (%)                                               | Nt (%)                                                  |
|---------------------------------------------|------------------------------------------------------|---------------------------------------------------------|---------------------------------------------------------|---------------------------------------------------------|
| Mixture of perennial grasses and leguminous |                                                      |                                                         |                                                         |                                                         |
| V1 - Control                                | 5.87 ± 0.10 b<br>(cv)                                | 1.88 ± 0.07 d<br>(cv)                                   | 3.24 ± 0.11 c<br>(cv)                                   | 0.191 ± 0.01 d<br>(cv)                                  |
| V2 - NPK                                    | 5.59 ± 0.14 d<br>(oo)                                | 1.95 ± 0.07 d<br>(ns)                                   | 3.36 ± 0.13 c<br>(ns)                                   | 0.201 ± 0.02 c<br>(ns)                                  |
| V3 – 15 t/ha<br>MC                          | 5.70 ± 0.07 c<br>(ns)                                | 1.97 ± 0.06 d<br>(ns)                                   | 3.40 ± 0.12 c<br>(ns)                                   | 0.190 ± 0.02 d<br>(ns)                                  |
| V4 – 15 t/ha<br>MC + NPK                    | 5.69 ± 0.07 c<br>(ns)                                | 2.13 ± 0.11 b (**)                                      | 3.67 ± 0.19 b<br>(**)                                   | 0.214 ± 0.01 b<br>(ns)                                  |
| V5 – 30 t/ha<br>MC                          | 5.92 ± 0.06 b<br>(ns)                                | 2.07 ± 0.07 c (*)                                       | 3.57 ± 0.11 b<br>(**)                                   | 0.203 ± 0.01 c<br>(ns)                                  |
| V6 – 30 t/ha<br>MC + NPK                    | 6.06 ± 0.11 a<br>(*)                                 | 2.26 ± 0.07 a<br>(***)                                  | 3.90 ± 0.13 a<br>(***)                                  | 0.230 ± 0.03 a<br>(*)                                   |
| V7 – 60 t/ha<br>MC                          | 5.85 ± 0.04 b<br>(ns)                                | 2.17 ± 0.06 b (**)                                      | 3.74 ± 0.03 b<br>(**)                                   | 0.212 ± 0.02 b<br>(ns)                                  |
| V8 – 60 t/ha<br>MC + NPK                    | 5.81 ± 0.08 b<br>(ns)                                | 2.11 ± 0.04 c (**)                                      | 3.64 ± 0.08 b<br>(**)                                   | 0.213 ± 0.01 b<br>(ns)                                  |
| LSD                                         | LSD 5% - 0.182<br>LSD 1% - 0.276<br>LSD 0.1% - 0.443 | LSD 5% - 0.134%<br>LSD 1% - 0.202%<br>LSD 0.1% - 0.325% | LSD 5% - 0.210%<br>LSD 1% - 0.317%<br>LSD 0.1% - 0.510% | LSD 5% - 0.032%<br>LSD 1% - 0.048%<br>LSD 0.1% - 0.077% |
| Treatments                                  | pH                                                   | C <sub>org</sub> (%)                                    | Humus (%)                                               | Nt (%)                                                  |
| Winter wheat crop                           |                                                      |                                                         |                                                         |                                                         |
| V1 - Control                                | 6.00 ± 0.09 a<br>(cv)                                | 2.05 ± 0.19 c (cv)                                      | 3.53 ± 0.33 c<br>(cv)                                   | 0.204 ± 0.009 c<br>(cv)                                 |
| V2 - NPK                                    | 5.79 ± 0.06 b<br>(o)                                 | 2.07 ± 0.19 c (ns)                                      | 3.57 ± 0.34 c<br>(ns)                                   | 0.212 ± 0.006 c<br>(ns)                                 |
| V3 – 15 t/ha<br>MC                          | 5.93 ± 0.08 a<br>(ns)                                | 2.10 ± 0.09 c (ns)                                      | 3.62 ± 0.15 c<br>(ns)                                   | 0.211 ± 0.012 c<br>(ns)                                 |
| V4 – 15 t/ha<br>MC + NPK                    | 5.69 ± 0.10 c<br>(oo)                                | 2.28 ± 0.15 b (ns)                                      | 3.93 ± 0.25 b<br>(ns)                                   | 0.222 ± 0.008 b<br>(ns)                                 |
| V5 – 30 t/ha<br>MC                          | 5.95 ± 0.08 a<br>(ns)                                | 2.26 ± 0.13 b (ns)                                      | 3.90 ± 0.21 b<br>(ns)                                   | 0.224 ± 0.009 b<br>(ns)                                 |
| V6 – 30 t/ha<br>MC + NPK                    | 5.78 ± 0.09 b<br>(o)                                 | 2.14 ± 0.17 c (ns)                                      | 3.69 ± 0.29 c<br>(ns)                                   | 0.210 ± 0.011 c<br>(ns)                                 |
| V7 – 60 t/ha<br>MC                          | 5.95 ± 0.06 a<br>(ns)                                | 2.23 ± 0.14 b (ns)                                      | 3.84 ± 0.25 b<br>(ns)                                   | 0.220 ± 0.042 b<br>(ns)                                 |
| V8 – 60 t/ha<br>MC + NPK                    | 5.85 ± 0.10 a<br>(ns)                                | 2.50 ± 0.09 a (**)                                      | 4.31 ± 0.16 a<br>(**)                                   | 0.240 ± 0.007 a<br>(*)                                  |
| LSD                                         | LSD 5% - 0.146<br>LSD 1% - 0.222<br>LSD 0.1% - 0.356 | LSD 5% - 0.238%<br>LSD 1% - 0.360%<br>LSD 0.1% - 0.579% | LSD 5% - 0.406%<br>LSD 1% - 0.615%<br>LSD 0.1% - 0.987% | LSD 5% - 0.029%<br>LSD 1% - 0.044%<br>LSD 0.1% - 0.071% |

| Treatments               | pH                                                   | C <sub>org</sub> (%)                                    | Humus (%)                                               | Nt (%)                                                  |
|--------------------------|------------------------------------------------------|---------------------------------------------------------|---------------------------------------------------------|---------------------------------------------------------|
| Maize crop               |                                                      |                                                         |                                                         |                                                         |
| V1 - Control             | 5.76 ± 0.14 a<br>(cv)                                | 2.04 ± 0.07 c (cv)                                      | 3.52 ± 0.12 d<br>(cv)                                   | 0.197 ± 0.012 c<br>(cv)                                 |
| V2 - NPK                 | 5.54 ± 0.14 b<br>(o)                                 | 2.06 ± 0.06 c (ns)                                      | 3.55 ± 0.11 d<br>(ns)                                   | 0.200 ± 0.011 c<br>(ns)                                 |
| V3 – 15 t/ha<br>MC       | 5.55 ± 0.14 a<br>(o)                                 | 2.14 ± 0.04 c (ns)                                      | 3.69 ± 0.06 d<br>(ns)                                   | 0.203 ± 0.008 c<br>(ns)                                 |
| V4 – 15 t/ha<br>MC + NPK | 5.51 ± 0.11 b<br>(o)                                 | 2.13 ± 0.10 c (ns)                                      | 3.67 ± 0.16 d<br>(ns)                                   | 0.201 ± 0.008 c<br>(ns)                                 |
| V5 – 30 t/ha<br>MC       | 5.63 ± 0.11 a<br>(ns)                                | 2.19 ± 0.07 a (*)                                       | 3.78 ± 0.11 c (*)                                       | 0.211 ± 0.006 c<br>(ns)                                 |
| V6 – 30 t/ha<br>MC + NPK | 5.55 ± 0.06 b<br>(o)                                 | 2.37 ± 0.08 b<br>(***)                                  | 4.09 ± 0.13 a<br>(***)                                  | 0.231 ± 0.006 a<br>(**)                                 |
| V7 – 60 t/ha<br>MC       | 5.51 ± 0.04 b<br>(o)                                 | 2.26 ± 0.09 b (ns)                                      | 3.90 ± 0.13 b<br>(**)                                   | 0.221 ± 0.010 a<br>(*)                                  |
| V8 – 60 t/ha<br>MC + NPK | 5.58 ± 0.09 a<br>(ns)                                | 2.30 ± 0.06 c (**)                                      | 3.97 ± 0.09 b<br>(**)                                   | 0.222 ± 0.008 a<br>(**)                                 |
| LSD                      | LSD 5% - 0.198<br>LSD 1% - 0.300<br>LSD 0.1% - 0.481 | LSD 5% - 0.132%<br>LSD 1% - 0.199%<br>LSD 0.1% - 0.320% | LSD 5% - 0.215%<br>LSD 1% - 0.325%<br>LSD 0.1% - 0.522% | LSD 5% - 0.016%<br>LSD 1% - 0.025%<br>LSD 0.1% - 0.040% |
| Treatments               | pH                                                   | C <sub>org</sub> (%)                                    | Humus (%)                                               | Nt (%)                                                  |
| Soybean crop             |                                                      |                                                         |                                                         |                                                         |
| V1 - Control             | 5.96 ± 0.11 b<br>(cv)                                | 2.06 ± 0.05 c (cv)                                      | 3.55 ± 0.08 d<br>(cv)                                   | 0.207 ± 0.008 c<br>(cv)                                 |
| V2 - NPK                 | 6.02 ± 0.06 b<br>(ns)                                | 2.16 ± 0.07 c (ns)                                      | 3.72 ± 0.12 c<br>(ns)                                   | 0.210 ± 0.007 c<br>(ns)                                 |
| V3 – 15 t/ha<br>MC       | 6.27 ± 0.05 a<br>(**)                                | 2.14 ± 0.13 c (ns)                                      | 3.69 ± 0.22 c<br>(ns)                                   | 0.212 ± 0.008 c<br>(ns)                                 |
| V4 – 15 t/ha<br>MC + NPK | 5.84 ± 0.13 b<br>(ns)                                | 2.37 ± 0.03 a<br>(***)                                  | 4.09 ± 0.04 a<br>(***)                                  | 0.230 ± 0.005 a<br>(**)                                 |
| V5 – 30 t/ha<br>MC       | 5.87 ± 0.11 b<br>(ns)                                | 2.06 ± 0.09 c (ns)                                      | 3.55 ± 0.15 d<br>(ns)                                   | 0.200 ± 0.010 c<br>(ns)                                 |
| V6 – 30 t/ha<br>MC + NPK | 5.70 ± 0.06 d<br>(oo)                                | 2.39 ± 0.06 a<br>(***)                                  | 4.12 ± 0.10 a<br>(***)                                  | 0.231 ± 0.009 a<br>(**)                                 |
| V7 – 60 t/ha<br>MC       | 5.76 ± 0.06 c<br>(o)                                 | 2.14 ± 0.04 c (ns)                                      | 3.69 ± 0.06 c<br>(ns)                                   | 0.214 ± 0.008 c<br>(ns)                                 |
| V8 – 60 t/ha<br>MC + NPK | 6.29 ± 0.09 a<br>(**)                                | 2.28 ± 0.06 b (**)                                      | 3.93 ± 0.11 b<br>(**)                                   | 0.222 ± 0.006 b<br>(*)                                  |
| LSD                      | LSD 5% - 0.151<br>LSD 1% - 0.228<br>LSD 0.1% - 0.367 | LSD 5% - 0.120%<br>LSD 1% - 0.181%<br>LSD 0.1% - 0.291% | LSD 5% - 0.206%<br>LSD 1% - 0.312%<br>LSD 0.1% - 0.501% | LSD 5% - 0.013%<br>LSD 1% - 0.020%<br>LSD 0.1% - 0.033% |

Significant differences between treatments are indicated by different lowercase letters (Duncan's test;  $p < 0.05$ ; mean  $\pm$  SD,  $n = 4$ ). Means followed by the same letter are not significantly different (ns); \*\*\*, \*\*, and \* indicate significant differences at LSD 5%, LSD 1%, and LSD 0.1% respectively; ns—non-significant; ooo, oo and o, indicate negative significant differences compared to the control, cv – control variant.

Abbreviations: manure compost (MC); chemical fertilisers only (NPK); least significant differences (LSD); organic carbon (C<sub>org</sub>); total nitrogen (Nt)
